# Supplementary material
Source: PubMed Central journal article supplement (PMC6499654)
Supplement: NIHMS1523461-supplement-3.pdf [file NIHMS1523461-supplement-3.pdf]

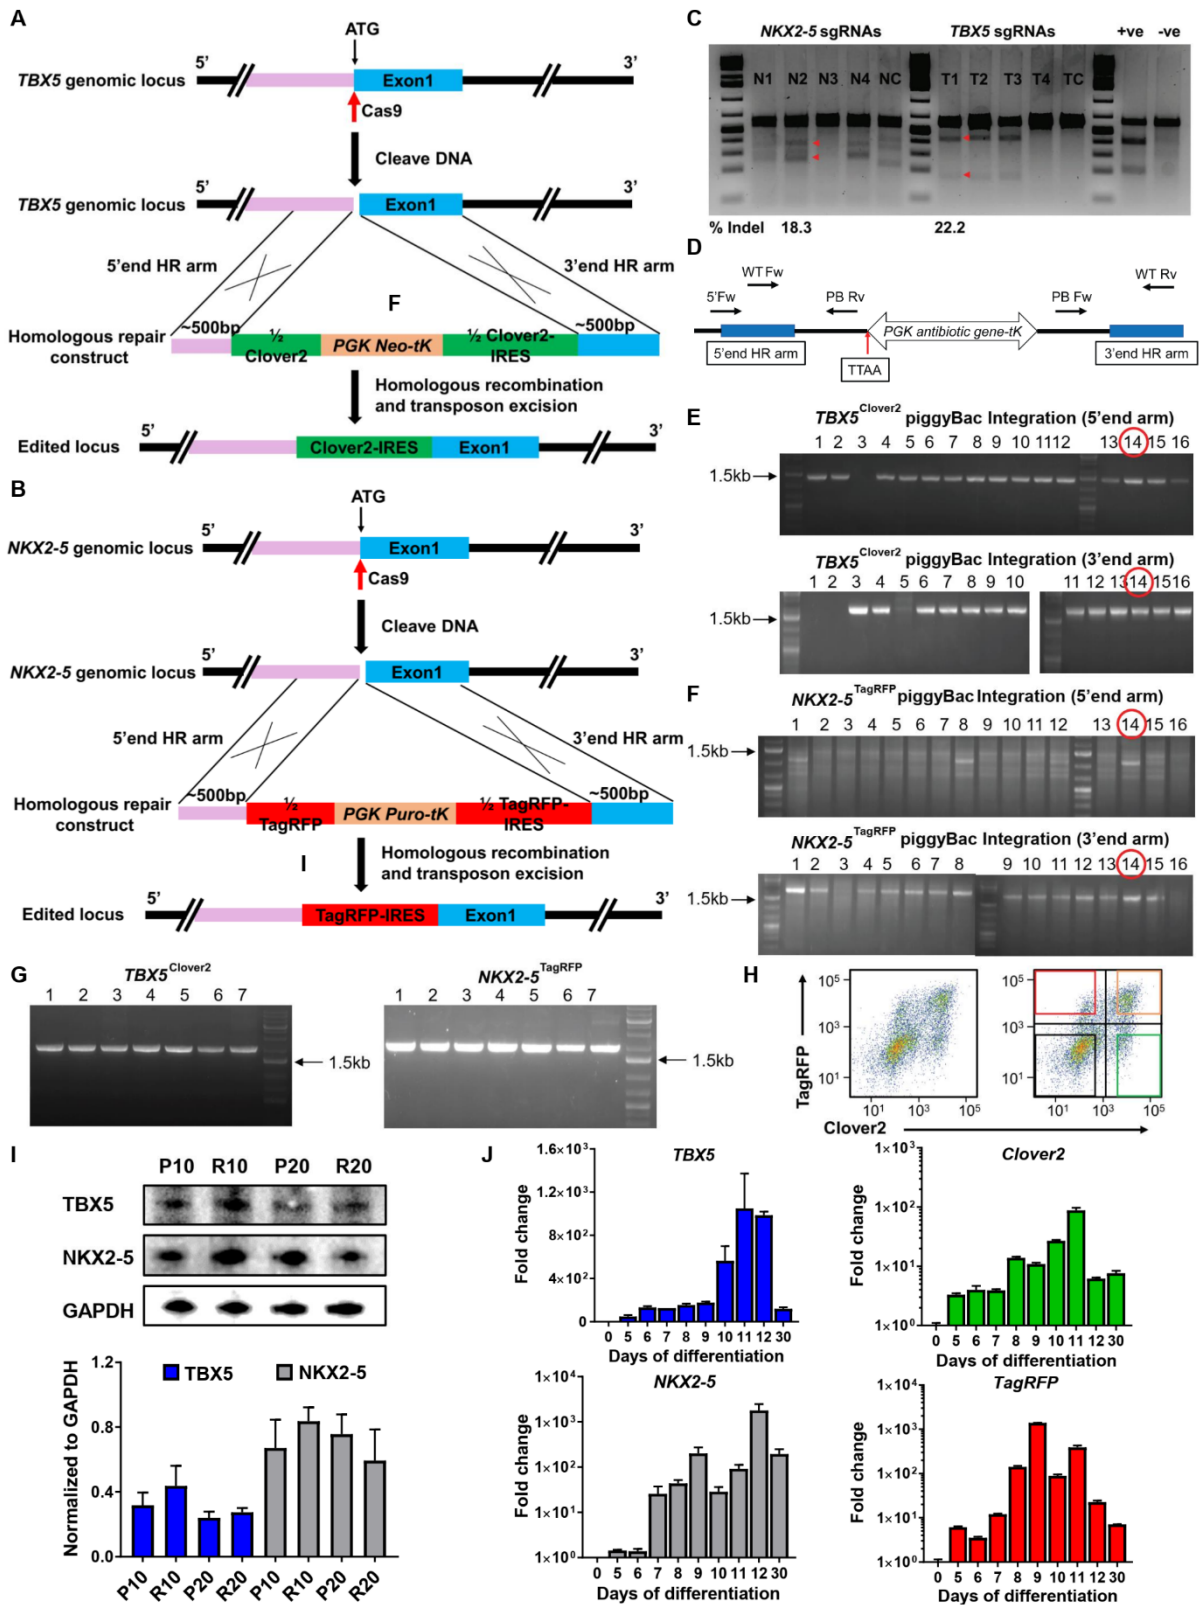

**Figure S1 (Related to Figure 1). Generation of TBX5<sup>Clover2</sup>/NKX2-5<sup>TagRFP</sup> hiPSC double reporter.**

**(A-B)** Schematic of introducing Clover2 and TagRFP into **(A)** TBX5 and **(B)** NKX2-5 locus, respectively.

**(C)** Determination of the indel percentage by SURVEYOR assay in HEK 293 cells. Red arrowheads indicate expected fragments for each locus. Numbers at bottom indicate Cas9-mediated cleavage efficiency (percentage of indel). The sgRNAs N2 and T1 were used for this study. HR: homologous recombination.

**(D)** Schematic of primer design for determination of genome-edited clones. WT, wild type; PB, piggyBac; Fw, forward primer; Rv, reverse primer (See also **Table S1**).

**(E-F)** PCR-based screening of homology-directed piggyBac transposon integration at 5' end HR arm (upper panels) and 3' end HR arm (lower panels) into **(E)** TBX5 and **(F)** NKX2-5 locus. Clone 14 (red circle) was selected for excision of piggyBac transposon.

**(G)** PCR-based screening of transposon-excised clones using WT primers.

**(H)** Representative fluorescence-activated cell sorting (FACS) plot (left) shows four discrete clusters of cells derived from TBX5<sup>Clover2</sup>/NKX2-5<sup>TagRFP</sup> hiPSC reporter during cardiac differentiation. The same FACS plot on the right shows the gating strategy for cell sorting (colored boxes) and analysis (black lines).

**(I)** Protein expression of TBX5 and NKX2-5 on days 10 and 20 hiPSC-CMs derived from the reporter (R) and parental lines (P) (n=3).

**(J)** Kinetic gene expression of TBX5, Clover2, NKX2-5, and TagRFP from three independent differentiation.

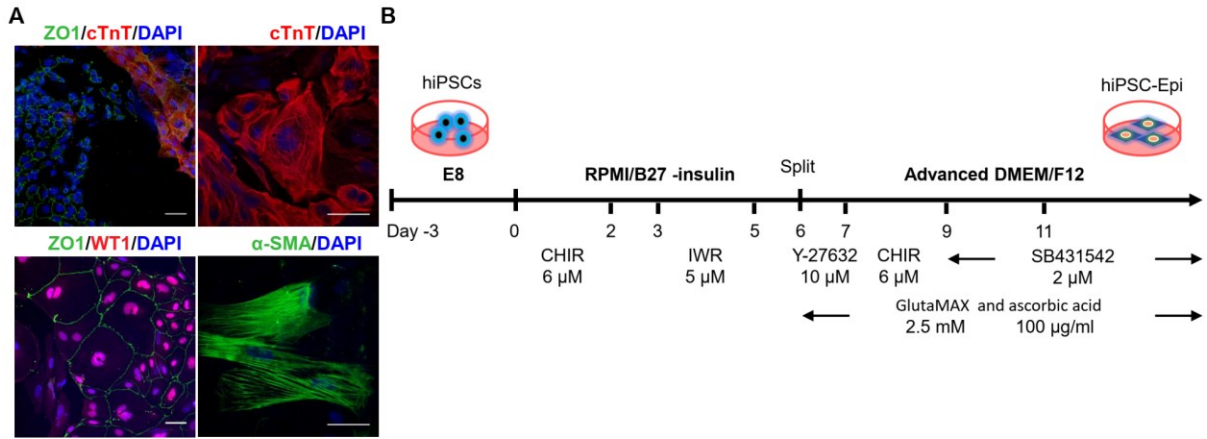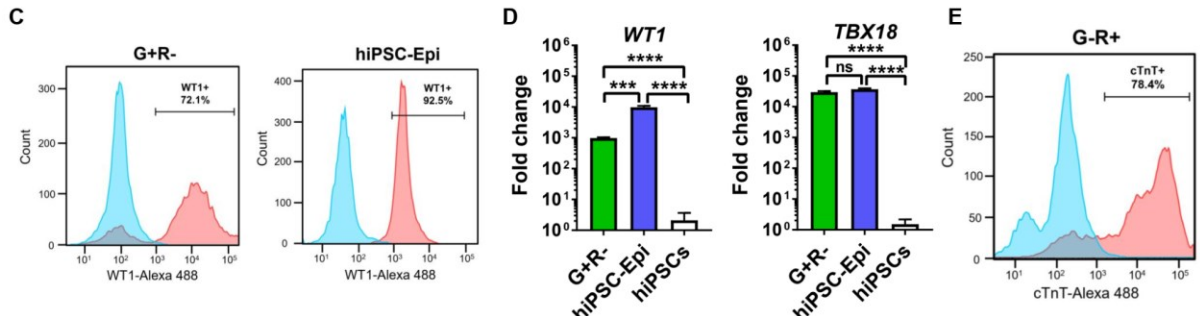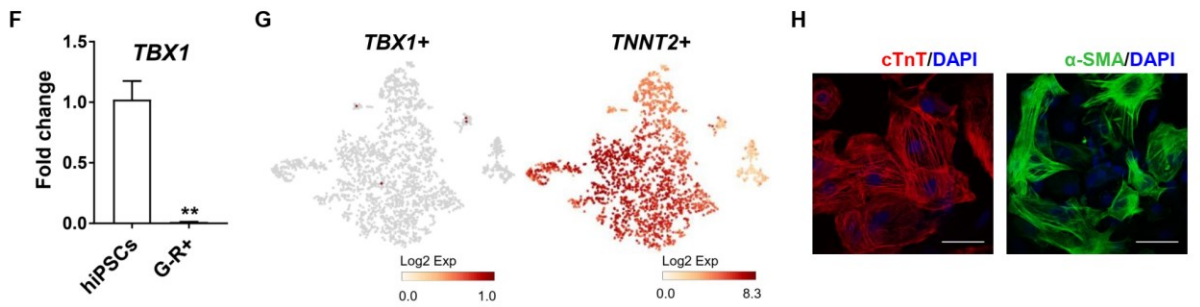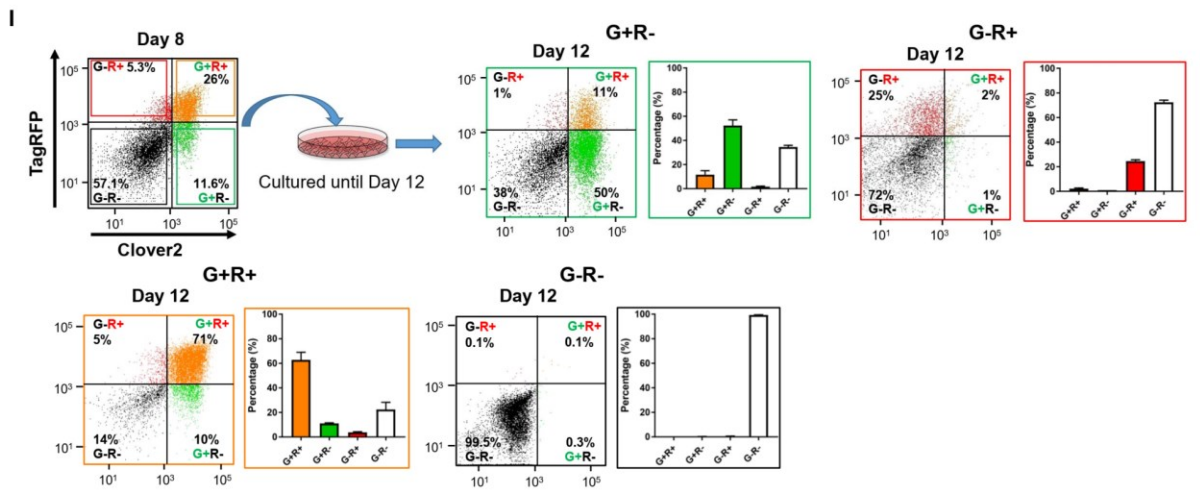

**Figure S2 (Related to Figure 2). Determination of the identity of G+R- and G-R+ subpopulations.**

**(A)** Immunostaining of day 30 G+R- cells showing a mixture of ZO1+ (green) and cardiac troponin T+ (cTnT, red) cells. ZO1+ cells are also WT1+ (red). Scale bars, 50  $\mu$ m.

**(B)** Schematic of epicardial cell differentiation protocol.

**(C)** Flow cytometry of WT1 in day 30 G+R- and hiPSC-epicardial (hiPSC-Epi) cells.

**(D)** Expression of WT1 and TBX18 in day 30 G+R- subpopulation, hiPSC-Epi, and hiPSCs (n=3; \*\*\*p<0.001, \*\*\*\*p<0.0001, ns = not significant).

**(E)** Flow cytometry of cTnT in day 30 G-R+ subpopulation.

**(F)** Expression of TBX1 in hiPSCs and day 30 G-R+ subpopulation (n=3; \*\*p<0.01).

**(G)** The t-distributed stochastic neighbor embedding (t-SNE) plot of day 30 cardiomyocytes showing TBX1+ cells (left) and TNNT2+ cells (right). Single cell RNA-seq dataset is from (Churko et al., 2018).

**(H)** Immunostaining of G-R+ cells showing differentiated cardiomyocytes (cTnT) and smooth muscle cells ( $\alpha$ -SMA). Scale bars, 50  $\mu$ m.

**(I)** Flow cytometry shows dynamic changes in the expression of TBX5 and NKX2-5 in each subpopulation from days 8 to 12 from three independent experiments.

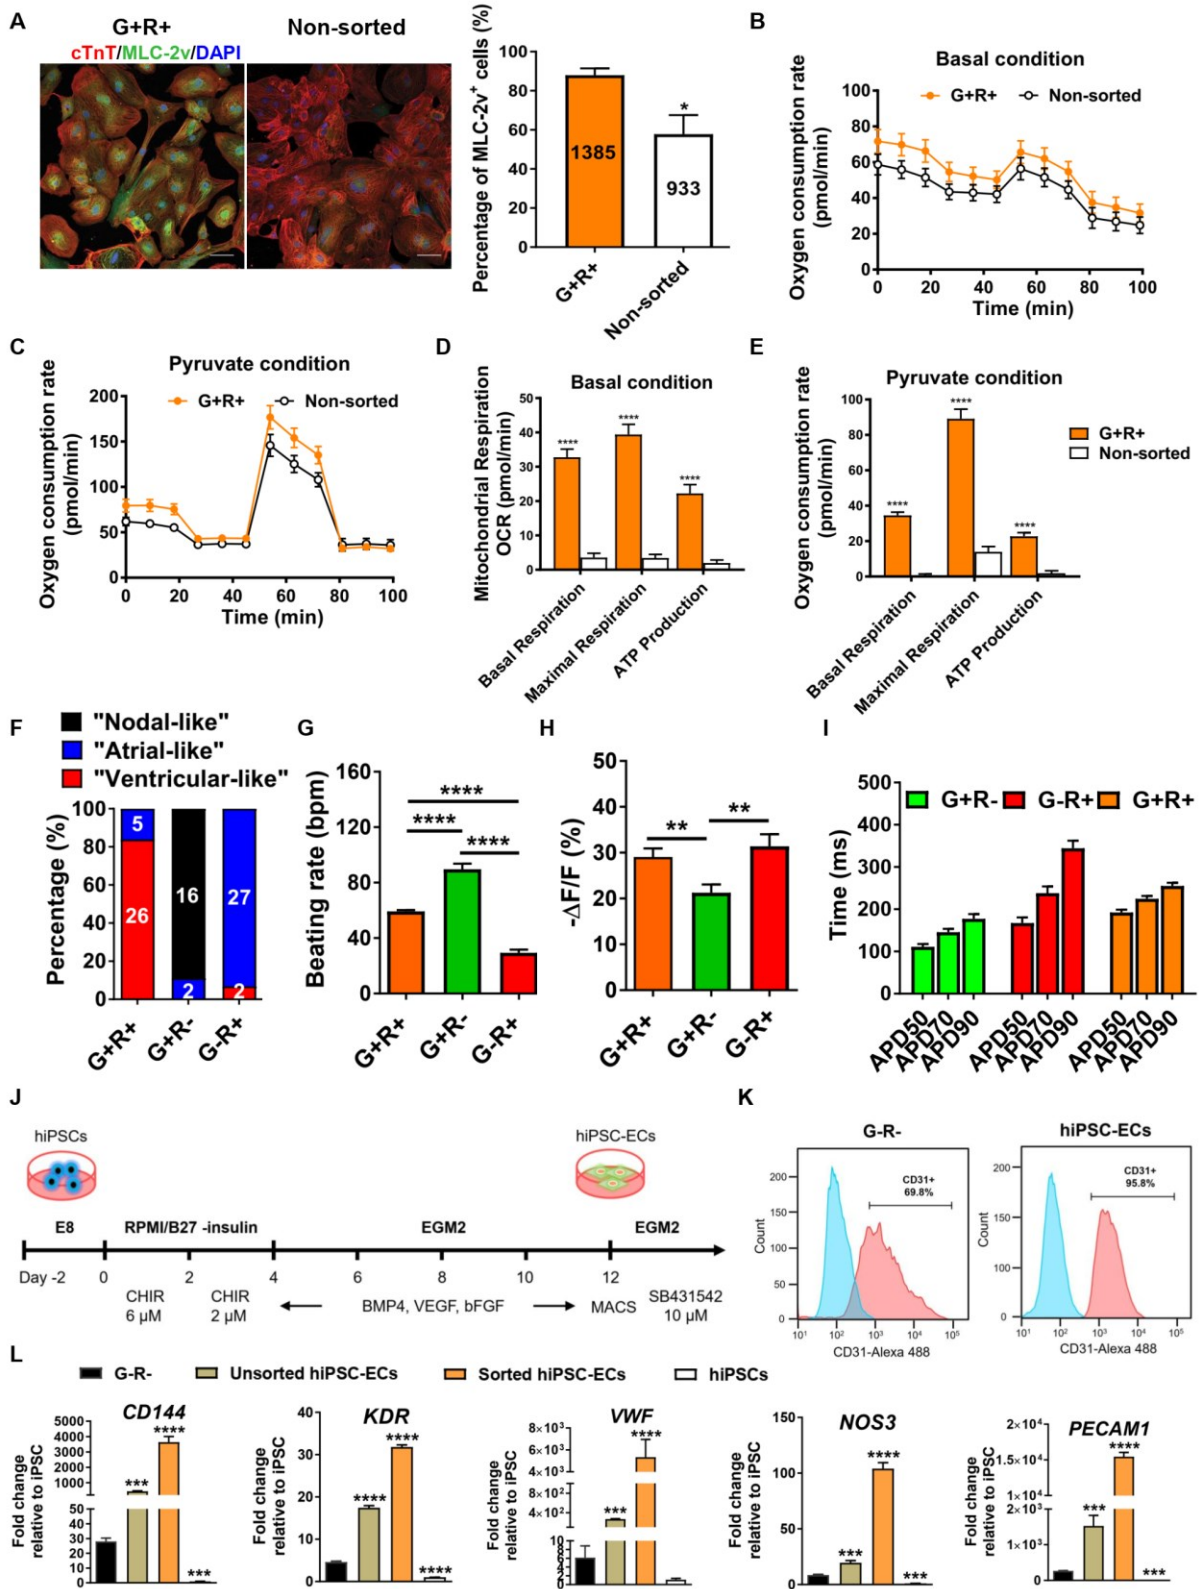

**Figure S3 (Related to Figure 2). Characterization of G+R+ and G-R- subpopulations.**

**(A)** Co-immunostaining of day 30 G+R+ and non-sorted cardiomyocytes for cardiac troponin T (cTnT, red) and ventricular myosin light chain 2 (MLC-2v, green). Scale bars, 50  $\mu$ m. Average percentage of MLC-2v+ cells out of total cTnT+ cells. 1,385 cells from the G+R+ subpopulation and 933 cells from the non-sorted population were analyzed in 7 regions of interest from two independent experiments (\* $p < 0.05$ ).

**(B-C)** Representative Seahorse extracellular-flux assay traces measuring oxygen consumption rate under **(B)** basal and **(C)** pyruvate condition.

**(D-E)** Quantitative analysis of oxygen consumption rate under **(D)** basal and **(E)** pyruvate condition (n=8; \*\*\*\* $p < 0.0001$ ).

**(F)** Percentage of subtypes in day 60 G+R+, G+R-, and G-R+ cardiomyocytes. Numbers indicate the recorded cell number.

**(G-I)** Quantification of beating rate, AP amplitude, and AP duration (APD) in day 60 G+R-, G-R+, and G+R+ cardiomyocytes (G+R-, n=18; G-R+, n=29; G+R+, n=31; \*\* $p < 0.01$ , \*\*\*\* $p < 0.0001$ ).

**(J)** Schematic of EC differentiation protocol.

**(K)** Flow cytometry analysis of CD31 expression in day 30 hiPSC-ECs and G-R- cells.

**(L)** Gene expression analysis of EC markers in day 30 G-R-, unsorted hiPSC-ECs, sorted hiPSC-ECs, and hiPSCs (n=3; \*\*\* $p < 0.001$ , \*\*\*\* $p < 0.0001$ , compared with G-R- group).

**A**

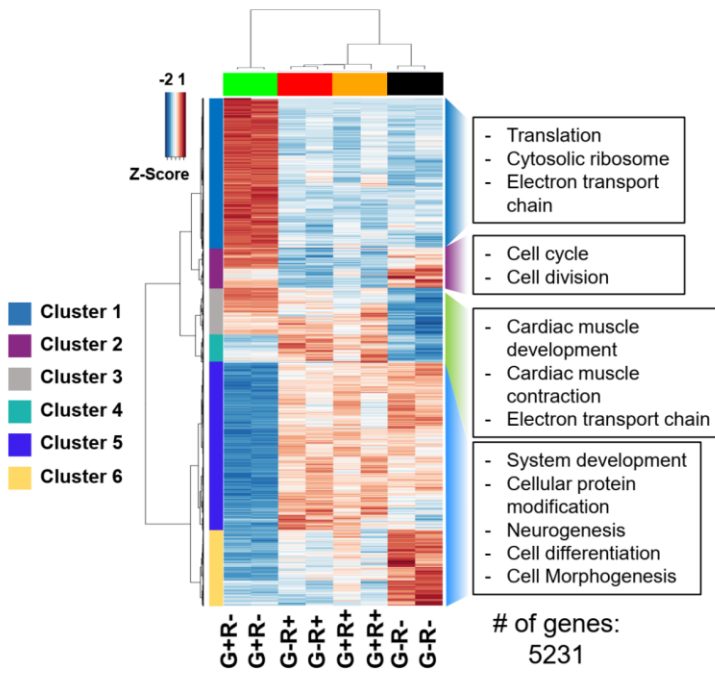

**B**

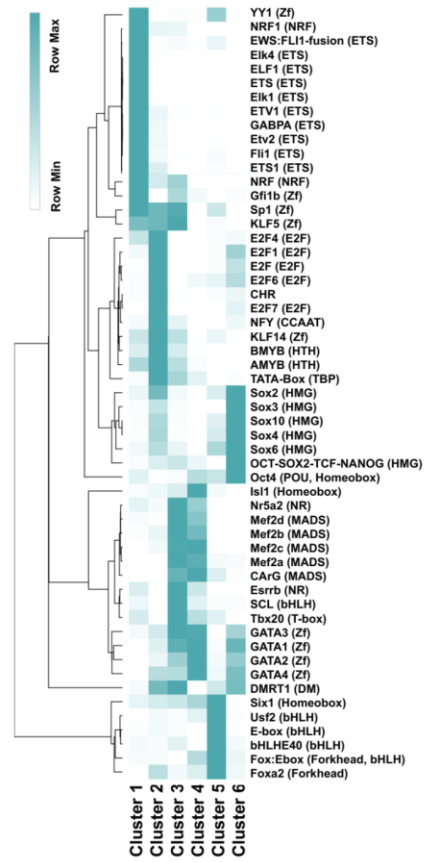

**Figure S4 (Related to Figure 3). Isolated subpopulations have differential transcriptome.**

**(A)** Hierarchical clustering shows 6 different clusters and associated GO pathways.

**(B)** Heatmap shows prediction of transcription factor binding sites on the promoters of clustered genes.



**Table S1 (Related to Figure 1). Design of primers for confirming gene integration and excision of transposon.**

| <b>Primers</b>                              | <b>Sequences</b>         | <b>Notes</b>                              |
|---------------------------------------------|--------------------------|-------------------------------------------|
| TBX5 5'end HR arm forward                   | TTTTGTCCTCGCCAATCCTG     | Testing TBX5 5'end HR arm integration     |
| PiggyBac reverse                            | AGACCGATAAAACACATGCGTCAA |                                           |
| PiggyBac forward                            | GTCCTAAATGCACAGCGACG     | Testing TBX5 3'end HR arm integration     |
| <i>TBX5</i> WT reverse                      | TGTTAGCTGACCCCAAACGG     |                                           |
| <i>TBX5</i> WT forward                      | AGGTGCTGGTAGCTGGAAAC     | Testing piggyBac excision at TBX5 locus   |
| <i>TBX5</i> WT reverse                      | TGTTAGCTGACCCCAAACGG     |                                           |
| NKX2-5 5'end HR arm forward                 | CTCCAAACAGGGGAAACAAGGT   | Testing NKX2-5 5'end HR arm integration   |
| PiggyBac reverse                            | AGACCGATAAAACACATGCGTCAA |                                           |
| PiggyBac forward                            | GTCCTAAATGCACAGCGACG     | Testing NKX2-5 3'end HR arm integration   |
| <i>NKX2-5</i> WT reverse                    | TCTCAACTTCCTACCAGACCCA   |                                           |
| <i>NKX2-5</i> WT forward                    | ACTGCTCATCGCTCCTGTCA     | Testing piggyBac excision at NKX2-5 locus |
| <i>NKX2-5</i> WT reverse                    | TCTCAACTTCCTACCAGACCCA   |                                           |
| HR, homologous recombination; WT, wild type |                          |                                           |

**Table S2 (Related to Figure 1). Statistical analysis of gene expression of subpopulations isolated on day**

**10.** *P*-values are reported for one-way ANOVA with post-hoc Tukey test for multiple comparisons of gene expression between different subpopulations.

| <b>Gene</b>          | <b>Population 1</b> | <b>Population 2</b> | <b><i>P</i>-value</b> | <b>Gene</b>         | <b>Population 1</b> | <b>Population 2</b> | <b><i>P</i>-value</b> |
|----------------------|---------------------|---------------------|-----------------------|---------------------|---------------------|---------------------|-----------------------|
| <b><i>TBX5</i></b>   | G+R+                | G+R-                | 0.0155                | <b><i>MEF2C</i></b> | G+R+                | G+R-                | 0.996                 |
|                      |                     | G-R+                | < 0.0001              |                     |                     | G-R+                | 0.0153                |
|                      |                     | G-R-                | < 0.0001              |                     |                     | G-R-                | 0.5997                |
|                      | G+R-                | G-R+                | < 0.0001              |                     | G+R-                | G-R+                | 0.0205                |
|                      |                     | G-R-                | < 0.0001              |                     |                     | G-R-                | 0.4819                |
|                      |                     | G-R-                | 0.9877                |                     |                     | G-R-                | 0.0031                |
| <b><i>NKX2-5</i></b> | G+R+                | G+R-                | < 0.0001              | <b><i>WT1</i></b>   | G+R+                | G+R-                | < 0.0001              |
|                      |                     | G-R+                | < 0.0001              |                     |                     | G-R+                | 0.3655                |
|                      |                     | G-R-                | < 0.0001              |                     |                     | G-R-                | > 0.9999              |
|                      | G+R-                | G-R+                | < 0.0001              |                     | G+R-                | G-R+                | < 0.0001              |
|                      |                     | G-R-                | 0.5806                |                     |                     | G-R-                | < 0.0001              |
|                      |                     | G-R-                | < 0.0001              |                     |                     | G-R-                | 0.3648                |
| <b><i>GATA4</i></b>  | G+R+                | G+R-                | 0.0488                | <b><i>TBX18</i></b> | G+R+                | G+R-                | 0.0002                |
|                      |                     | G-R+                | 0.1681                |                     |                     | G-R+                | 0.6925                |
|                      |                     | G-R-                | 0.0009                |                     |                     | G-R-                | 0.6212                |
|                      | G+R-                | G-R+                | 0.0024                |                     | G+R-                | G-R+                | < 0.0001              |
|                      |                     | G-R-                | < 0.0001              |                     |                     | G-R-                | < 0.0001              |
|                      |                     | G-R-                | 0.0135                |                     |                     | G-R-                | 0.9992                |
| <b><i>TNNT2</i></b>  | G+R+                | G+R-                | 0.4786                | <b><i>PECAM</i></b> | G+R+                | G+R-                | 0.0164                |
|                      |                     | G-R+                | 0.0098                |                     |                     | G-R+                | 0.9968                |
|                      |                     | G-R-                | < 0.0001              |                     |                     | G-R-                | 0.0137                |
|                      | G+R-                | G-R+                | 0.077                 |                     | G+R-                | G-R+                | 0.0215                |
|                      |                     | G-R-                | < 0.0001              |                     |                     | G-R-                | 0.9991                |
|                      |                     | G-R-                | < 0.0001              |                     |                     | G-R-                | 0.018                 |
| <b><i>HCN4</i></b>   | G+R+                | G+R-                | 0.679                 | <b><i>KDR</i></b>   | G+R+                | G+R-                | 0.0073                |
|                      |                     | G-R+                | 0.0488                |                     |                     | G-R+                | 0.9891                |
|                      |                     | G-R-                | 0.0061                |                     |                     | G-R-                | 0.0003                |
|                      | G+R-                | G-R+                | 0.0104                |                     | G+R-                | G-R+                | 0.0108                |
|                      |                     | G-R-                | 0.0016                |                     |                     | G-R-                | 0.0824                |
|                      |                     | G-R-                | 0.453                 |                     |                     | G-R-                | 0.0004                |
| <b><i>ISL1</i></b>   | G+R+                | G+R-                | 0.0039                |                     |                     |                     |                       |
|                      |                     | G-R+                | 0.0023                |                     |                     |                     |                       |
|                      |                     | G-R-                | 0.0109                |                     |                     |                     |                       |
|                      | G+R-                | G-R+                | 0.966                 |                     |                     |                     |                       |
|                      |                     | G-R-                | 0.8424                |                     |                     |                     |                       |
|                      |                     | G-R-                | 0.5981                |                     |                     |                     |                       |

**Table S4 (Related to STAR Methods). The oligonucleotides used for this study.**

| <b>Gene</b> | <b>Source</b>           | <b>Identifier</b> |
|-------------|-------------------------|-------------------|
| 18s         | ThermoFisher Scientific | Hs99999901_s1     |
| TBX5        | ThermoFisher Scientific | Hs00361155_m1     |
| NKX2-5      | ThermoFisher Scientific | Hs00231763_m1     |
| GATA4       | ThermoFisher Scientific | Hs00171403_m1     |
| TNNT2       | ThermoFisher Scientific | Hs00943911_m1     |
| MEF2C       | ThermoFisher Scientific | Hs00231149_m1     |
| HCN4        | ThermoFisher Scientific | Hs00975492_m1     |
| ISL1        | ThermoFisher Scientific | Hs00158126_m1     |
| WT1         | ThermoFisher Scientific | Hs01103751_m1     |
| TBX18       | ThermoFisher Scientific | Hs01385457_m1     |
| PECAM1      | ThermoFisher Scientific | Hs01065279_m1     |
| KDR         | ThermoFisher Scientific | Hs00911700_m1     |
| KCNJ2       | ThermoFisher Scientific | Hs01876357_s1     |
| KCNJ3       | ThermoFisher Scientific | Hs04334861_s1     |
| KCNJ12      | ThermoFisher Scientific | Hs00266926_s1     |
| KCNJ4       | ThermoFisher Scientific | Hs00705379_s1     |
| MYL7        | ThermoFisher Scientific | Hs01085598_g1     |
| NR2F2       | ThermoFisher Scientific | Hs00819630_m1     |
| PITX2       | ThermoFisher Scientific | Hs04234069_mH     |
| HAND1       | ThermoFisher Scientific | Hs02330376_s1     |
| HAND2       | ThermoFisher Scientific | Hs00232769_m1     |
| KCNH2       | ThermoFisher Scientific | Hs04234270_g1     |
| KCNIP2      | ThermoFisher Scientific | Hs01552688_g1     |
| SCN5A       | ThermoFisher Scientific | Hs00165693_m1     |
| TCF21       | ThermoFisher Scientific | Hs00162646_m1     |
| TBX1        | ThermoFisher Scientific | Hs00962558_g1     |
| MYH11       | ThermoFisher Scientific | Hs00975796_m1     |
| SHOX2       | ThermoFisher Scientific | Hs00243203_m1     |
| ACTA2       | ThermoFisher Scientific | Hs00426835_g1     |
| IRX4        | ThermoFisher Scientific | Hs00212560_m1     |
| VWF         | ThermoFisher Scientific | Hs01109446_m1     |
| NOS3        | ThermoFisher Scientific | Hs01574665_m1     |
| CD144       | ThermoFisher Scientific | Hs00901465_m1     |
| MYL2        | ThermoFisher Scientific | Hs00166405_m1     |
| HCN1        | ThermoFisher Scientific | Hs01085412_m1     |
| TBX2        | ThermoFisher Scientific | Hs00911929_m1     |
| TBX3        | ThermoFisher Scientific | Hs00195612_m1     |
| CORIN       | ThermoFisher Scientific | Hs00198141_m1     |
| Clover2     | ThermoFisher Scientific | Custom design     |
| TagRFP      | ThermoFisher Scientific | Custom design     |
